# Supplementary material for: Isatin-based spiro indolenine alkaloids from Isatis indigotica Fortune with anti-neuroinflammatory and acetylcholinesterase inhibitory effects
Source: Royal Society of Chemistry journal article supplement (doi:10.1039/d3qo01769a), 2023-11-21
Supplement: d3qo01769a1.pdf [file d3qo01769a1.pdf]

## Supporting Information

### Isatin-based spiro indolenine alkaloids from *Isatis indigotica* Fortune with anti-neuroinflammatory and acetylcholinesterase inhibitor effects

Ming Bai<sup>a,1</sup>, Yu-Fei Xi<sup>a,1</sup>, Si-Hui Mi<sup>a</sup>, Pei-Yuan Yang<sup>a</sup>, Li-Li Lou<sup>a,\*</sup>, Tian-Ming Lv<sup>a</sup>, Xin Zhang<sup>a</sup>, Guo-Dong Yao<sup>a</sup>, Bin Lin<sup>b</sup>, Xiao-Xiao Huang<sup>a,c\*</sup>, Shao-Jiang Song<sup>a,\*</sup>

<sup>a</sup> Key Laboratory of Computational Chemistry-Based Natural Antitumor Drug Research & Development, Liaoning Province; Engineering Research Center of Natural Medicine Active Molecule Research & Development, Liaoning Province; Key Laboratory of Natural Bioactive Compounds Discovery & Modification, Shenyang; School of Traditional Chinese Materia Medica, Shenyang Pharmaceutical University, Shenyang, Liaoning 110016, China

<sup>b</sup> Wuya College of Innovation, Shenyang Pharmaceutical University, Shenyang, 110016, People's Republic of China

<sup>c</sup> State Key Laboratory of New-tech for Chinese Medicine Pharmaceutical Process, Jiangsu Kanion Pharmaceutical Co., Ltd., Lianyungang, Jiangsu 222001, China

\*Corresponding author.

E-mail: lou\_li\_li@163.com (L. L. Lou); xiaoxiao270@163.com (X. X. Huang); songsj99@163.com (S. J. Song)

<sup>1</sup> The two authors contributed equally to this work

## Content

**Table S1.**  $^1\text{H}$  (400 MHz) and  $^{13}\text{C}$  NMR (100 MHz) spectroscopic data of **1-3** in  $\text{DMSO-}d_6$ .

**Fig. S1.** UV spectrum of compound **1**.

**Fig. S2.** HRESIMS spectrum of compound **1**.

**Fig. S3.**  $^1\text{H}$  NMR spectrum (400 MHz,  $\text{DMSO-}d_6$ ) of compound **1**.

**Fig. S4.**  $^{13}\text{C}$  NMR spectrum (100 MHz,  $\text{DMSO-}d_6$ ) of compound **1**.

**Fig. S5.** HSQC spectrum (600 MHz,  $\text{DMSO-}d_6$ ) of compound **1**.

**Fig. S6.** HMBC spectrum (600 MHz,  $\text{DMSO-}d_6$ ) of compound **1**.

**Fig. S7.**  $^1\text{H-}^1\text{H}$  COSY spectrum (600 MHz,  $\text{DMSO-}d_6$ ) of compound **3**.

**Fig. S8.** NOESY spectrum (600 MHz,  $\text{DMSO-}d_6$ ) of compound **1**.

**Fig. S9.** Experimental ECD spectra of **1a**.

**Fig. S10.** Experimental ECD spectra of **1b**.

**Fig. S11.** The chiral HPLC chromatogram of compounds **1a** and **1b**.

**Fig. S12.** UV spectrum of compound **2**.

**Fig. S13.** HRESIMS spectrum of compound **2**.

**Fig. S14.**  $^1\text{H}$  NMR spectrum (400 MHz,  $\text{DMSO-}d_6$ ) of compound **2**.

**Fig. S15.**  $^{13}\text{C}$  NMR spectrum (100 MHz,  $\text{DMSO-}d_6$ ) of compound **2**.

**Fig. S16.** HSQC spectrum (600 MHz,  $\text{DMSO-}d_6$ ) of compound **2**.

**Fig. S17.** HMBC spectrum (600 MHz,  $\text{DMSO-}d_6$ ) of compound **2**.

**Fig. S18.** ROESY spectrum (600 MHz,  $\text{DMSO-}d_6$ ) of compound **2**.

**Fig. S19.**  $^1\text{H-}^1\text{H}$  COSY spectrum (600 MHz,  $\text{DMSO-}d_6$ ) of compound **2**.

**Fig. S20.** Experimental ECD spectra of **2**.

**Fig. S21.** UV spectrum of compound **3**.

**Fig. S22.** HRESIMS spectrum of compound **3**.

**Fig. S23.**  $^1\text{H}$  NMR spectrum (400 MHz,  $\text{DMSO-}d_6$ ) of compound **3**.

**Fig. S24.**  $^{13}\text{C}$  NMR spectrum (100 MHz,  $\text{DMSO-}d_6$ ) of compound **3**.

**Fig. S25.** HSQC spectrum (600 MHz,  $\text{DMSO-}d_6$ ) of compound **3**.

**Fig. S26.** HMBC spectrum (600 MHz,  $\text{DMSO-}d_6$ ) of compound **3**.

**Fig. S27.** NOESY spectrum (600 MHz, DMSO-*d*<sub>6</sub>) of compound **3**.

**Fig. S28.** Experimental ECD spectra of **3**.

**Table S1.** <sup>1</sup>H (400 MHz) and <sup>13</sup>C NMR (100 MHz) spectroscopic data of **1-3** in DMSO-*d*<sub>6</sub>.

| Position | 1                                           |                     | 2                                           |                     | 3                                           |                     |
|----------|---------------------------------------------|---------------------|---------------------------------------------|---------------------|---------------------------------------------|---------------------|
|          | $\delta_{\text{H}}$ (multi, <i>J</i> in Hz) | $\delta_{\text{C}}$ | $\delta_{\text{H}}$ (multi, <i>J</i> in Hz) | $\delta_{\text{C}}$ | $\delta_{\text{H}}$ (multi, <i>J</i> in Hz) | $\delta_{\text{C}}$ |
| 1        | 10.28, s                                    | –                   | 7.74, s                                     | –                   | 10.95, s                                    | –                   |
| 2        | –                                           | 173.1               | –                                           | 90.1                | –                                           | 124.6               |
| 3        | –                                           | 83.6                | –                                           | 193.3               | –                                           | 134.0               |
| 3a       | –                                           | 128.1               | –                                           | 121.4               | –                                           | 120.3               |
| 4        | 7.97, d (7.7)                               | 128.6               | 7.61, d (8.0)                               | 124.4               | 7.69, d (7.6)                               | 117.8               |
| 5        | 7.00, t (7.7)                               | 121.2               | 7.29, t (8.0)                               | 124.9               | 6.97, t (7.6)                               | 118.6               |
| 6        | 7.18, t (7.7)                               | 129.4               | 7.80, t (8.0)                               | 137.7               | 7.07, t (7.6)                               | 121.7               |
| 7        | 6.58, d (7.7)                               | 109.5               | 8.37, d (8.0)                               | 116.4               | 7.27, d (7.6)                               | 111.4               |
| 7a       | –                                           | 142.1               | –                                           | 150.7               | –                                           | 133.0               |
| 8        | –                                           | –                   | –                                           | 167.7               | –                                           | –                   |
| 9        | –                                           | –                   | –                                           | 83.7                | –                                           | –                   |
| 10       | –                                           | –                   | 4.99, s                                     | 85.6                | –                                           | –                   |
| 11       | –                                           | –                   | 4.23, d (4.4)                               | 78.9                | –                                           | –                   |
| 12       | –                                           | –                   | 3.82, t (6.6)                               | 89.4                | –                                           | –                   |
| 13       | –                                           | –                   | 3.42, overlapped                            | 62.1                | –                                           | –                   |
| 1'       | 3.47, d (12.2)                              | 49.2                | 7.02, s                                     | –                   | 4.51, d (7.1)                               | 108.2               |
| 2'       | 3.44, overlapped                            | 48.8                | –                                           | 68.1                | 4.58, overlapped                            | 70.5                |
| 3'       | 2.79, m                                     | 66.4                | –                                           | 196.6               | –                                           | 172.1               |
| 3'a      | –                                           | –                   | –                                           | 123.2               | –                                           | –                   |
| 4'       | 1.91, m; 1.68, m                            | 24.4                | 7.51, d (7.6)                               | 123.3               | 5.01, d (8.2)                               | 76.5                |
| 5'       | 1.79, m                                     | 17.5                | 6.83, overlapped                            | 119.0               | 3.20, m                                     | 78.3                |

|                        |                              |       |                  |       |                  |       |
|------------------------|------------------------------|-------|------------------|-------|------------------|-------|
| 6'                     | 3.10, dd (6.8, 8.2); 2.58, m | 52.1  | 7.39, t (7.6)    | 136.6 | 3.71, m; 3.62, m | 61.0  |
| 7'                     | –                            | 171.6 | 6.83, overlapped | 112.9 | 6.06, s          | 112.4 |
| 7'a                    | –                            | –     | –                | 160.4 | –                | –     |
| 8'                     | –                            | –     | –                | –     | –                | 172.1 |
| 1"                     | –                            | 124.6 | –                | –     | 4.59, overlapped | 63.3  |
| 2",6"                  | 6.00, s                      | 106.7 | –                | –     | –                | –     |
| 3",5"                  | –                            | 147.0 | –                | –     | –                | –     |
| 4"                     | –                            | 134.5 | –                | –     | –                | –     |
| 9-OH                   | –                            | –     | 6.57 (1H, s)     | –     | –                | –     |
| 11-OH                  | –                            | –     | 7.07, d (4.6)    | –     | –                | –     |
| 13-OH                  | –                            | –     | 4.83, t (4.8)    | –     | –                | –     |
| 2'-OH                  | –                            | –     | –                | –     | 6.76, d (5.9)    | –     |
| 6'-OH                  | –                            | –     | –                | –     | 5.06, t (5.5)    | –     |
| 7'-OCH <sub>3</sub>    | 3.46, s                      | 51.7  | –                | –     | –                | –     |
| 1"-OCH <sub>3</sub>    | –                            | –     | –                | –     | 3.28, s          | 57.2  |
| 3",5"-OCH <sub>3</sub> | 3.43, s                      | 55.7  | –                | –     | –                | –     |
| 4"-OH                  | 8.17, s                      | –     | –                | –     | –                | –     |

---

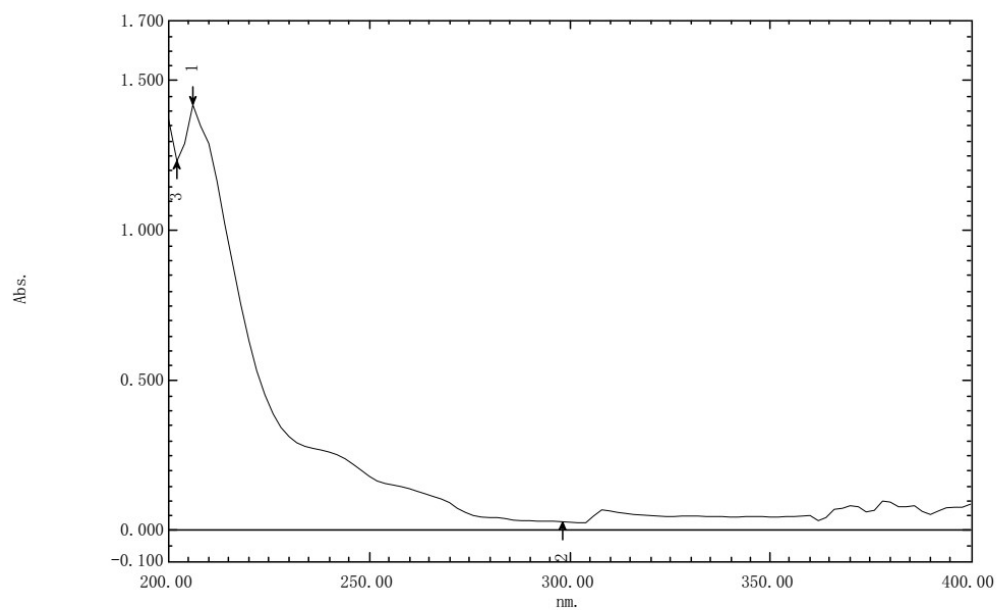

测定属性  
 波长范围 (nm.): 200.00到400.00  
 扫描速度: 高速  
 采样间隔: 2.0  
 自动采样间隔: 停用  
 扫描模式: 单一的

| No. | P/V | Wavelength | Abs.  | 描述 |
|-----|-----|------------|-------|----|
| 1   | ●   | 206.00     | 1.420 |    |
| 2   | ⬇   | 298.00     | .031  |    |
| 3   | ⬇   | 202.00     | 1.232 |    |

**Fig. S1** UV spectrum of compound 1.

## Mass Spectrum SmartFormula Report

**Analysis Info**

Analysis Name D:\Data\20200916CEYANG\IQY-110\_1-D,3\_01\_14944.d  
 Method 20200916ceyang.m  
 Sample Name DQY-110  
 Comment

Acquisition Date 9/16/2020 5:36:54 PM

Operator Bruker Customer  
 Instrument / Ser# micrOTOF-Q 125

**Acquisition Parameter**

|             |          |                       |           |                  |           |
|-------------|----------|-----------------------|-----------|------------------|-----------|
| Source Type | ESI      | Ion Polarity          | Positive  | Set Nebulizer    | 1.2 Bar   |
| Focus       | Active   | Set Capillary         | 4500 V    | Set Dry Heater   | 180 °C    |
| Scan Begin  | 50 m/z   | Set End Plate Offset  | -500 V    | Set Dry Gas      | 8.0 l/min |
| Scan End    | 1500 m/z | Set Collision Cell RF | 400.0 Vpp | Set Divert Valve | Source    |

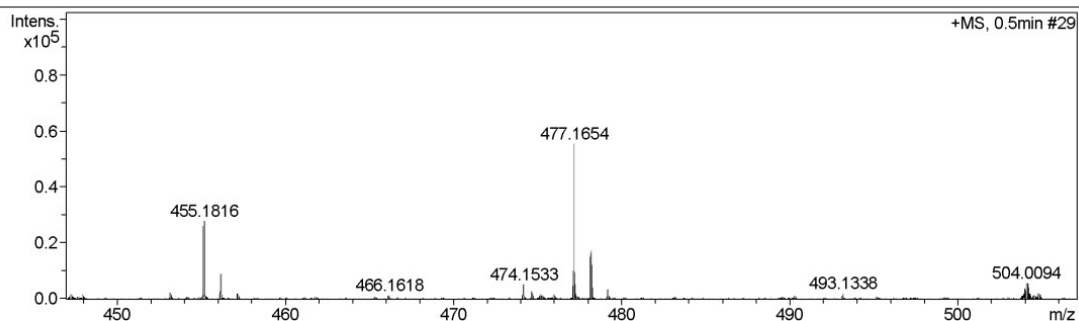

| Meas. # | Formula                                                         | m/z      | err [ppm] | Mean err [ppm] | rdb  | N-Rule | e <sup>-</sup> Conf | mSigma | Std I  | Std Mean | Std VarNo | Std m/z | Std Comb |
|---------|-----------------------------------------------------------------|----------|-----------|----------------|------|--------|---------------------|--------|--------|----------|-----------|---------|----------|
| 477.16  |                                                                 |          |           |                |      |        |                     |        |        |          |           |         |          |
| 54      |                                                                 |          |           |                |      |        |                     |        |        |          |           |         |          |
| 1       | C <sub>24</sub> H <sub>26</sub> N <sub>2</sub> NaO <sub>7</sub> | 477.1632 | -4.5      | -0.9           | 12.5 | ok     | even                | 24.99  | 0.0450 | 0.0028   | 0.0142    | 0.0059  | 0.8427   |

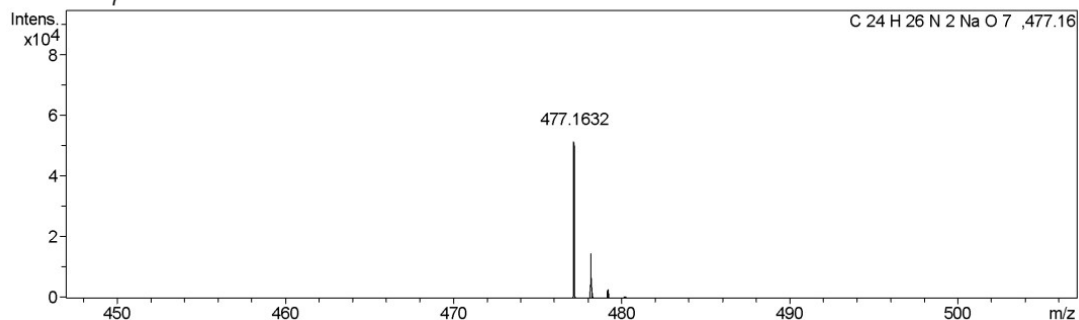

| Meas. # | Formula | m/z | err [ppm] | Mean err [ppm] | rdb | N-Rule | e <sup>-</sup> Conf | mSigma | Std I | Std Mean | Std VarNo | Std m/z | Std Comb |
|---------|---------|-----|-----------|----------------|-----|--------|---------------------|--------|-------|----------|-----------|---------|----------|
|         |         |     |           |                |     |        |                     |        |       |          |           |         |          |

**Fig. S2** HRESIMS spectrum of compound **1**.

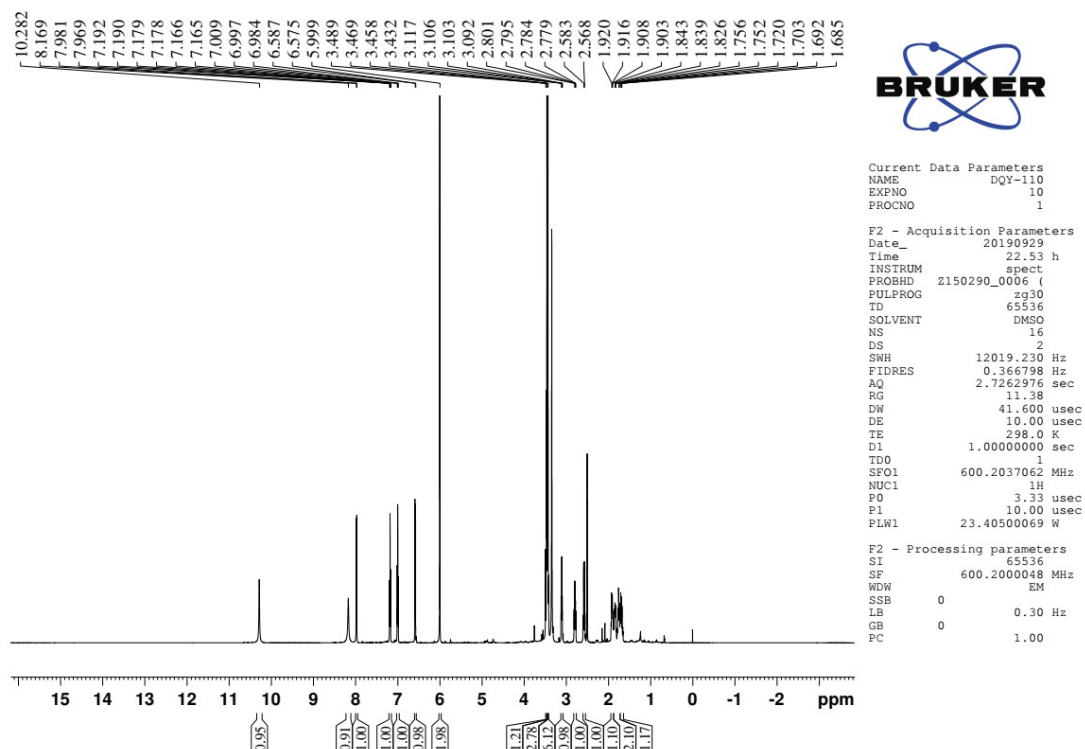

Fig. S3  $^1\text{H}$  NMR spectrum (400 MHz,  $\text{DMSO-}d_6$ ) of compound 1.

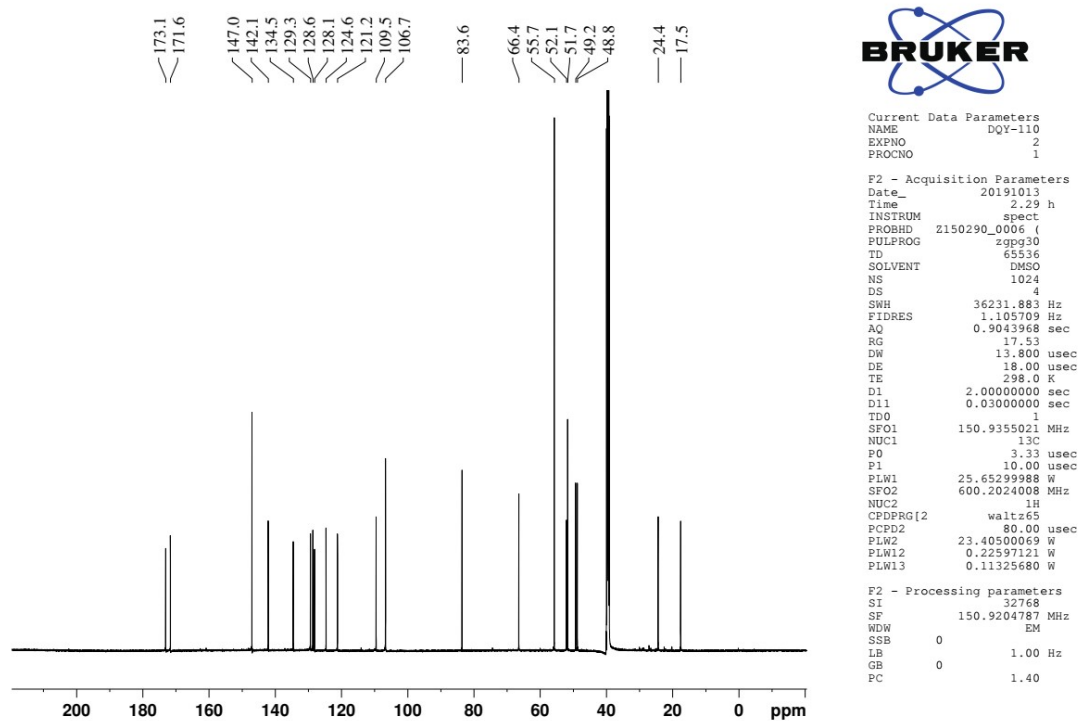

Fig. S4  $^{13}\text{C}$  NMR spectrum (100 MHz,  $\text{DMSO-}d_6$ ) of compound 1.



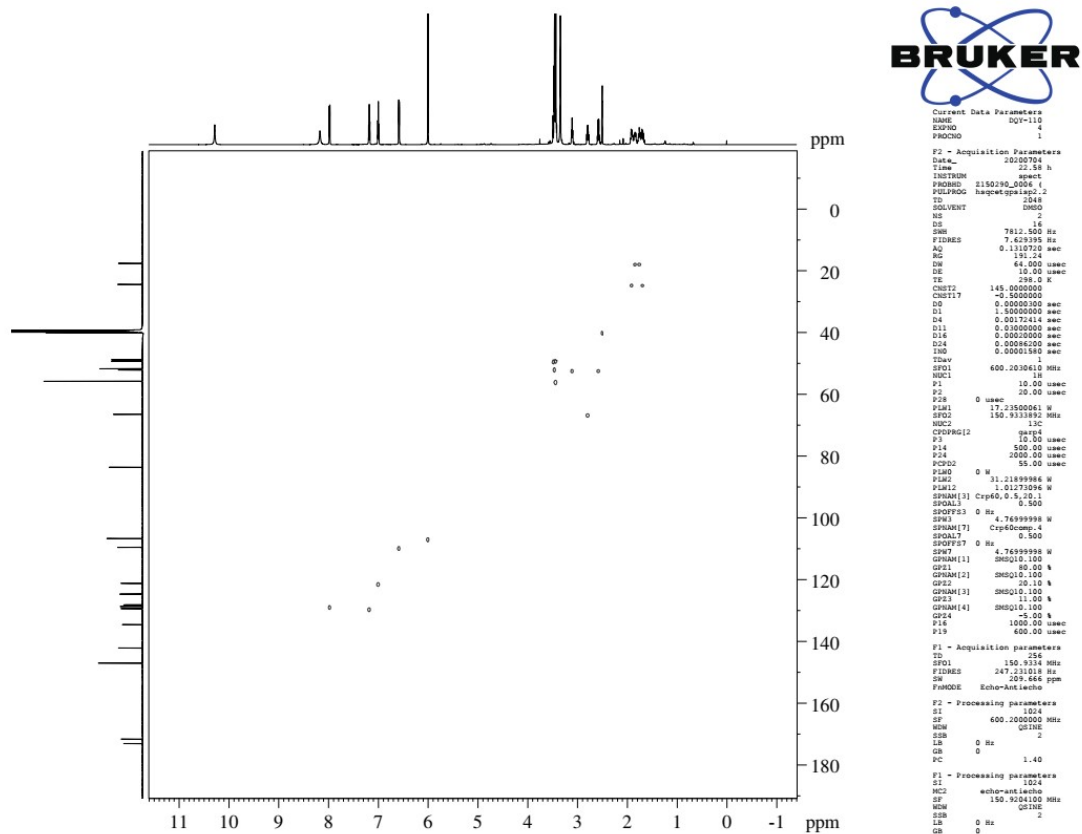

Fig. S5. HSQC spectrum (600 MHz, DMSO- $d_6$ ) of compound 1.

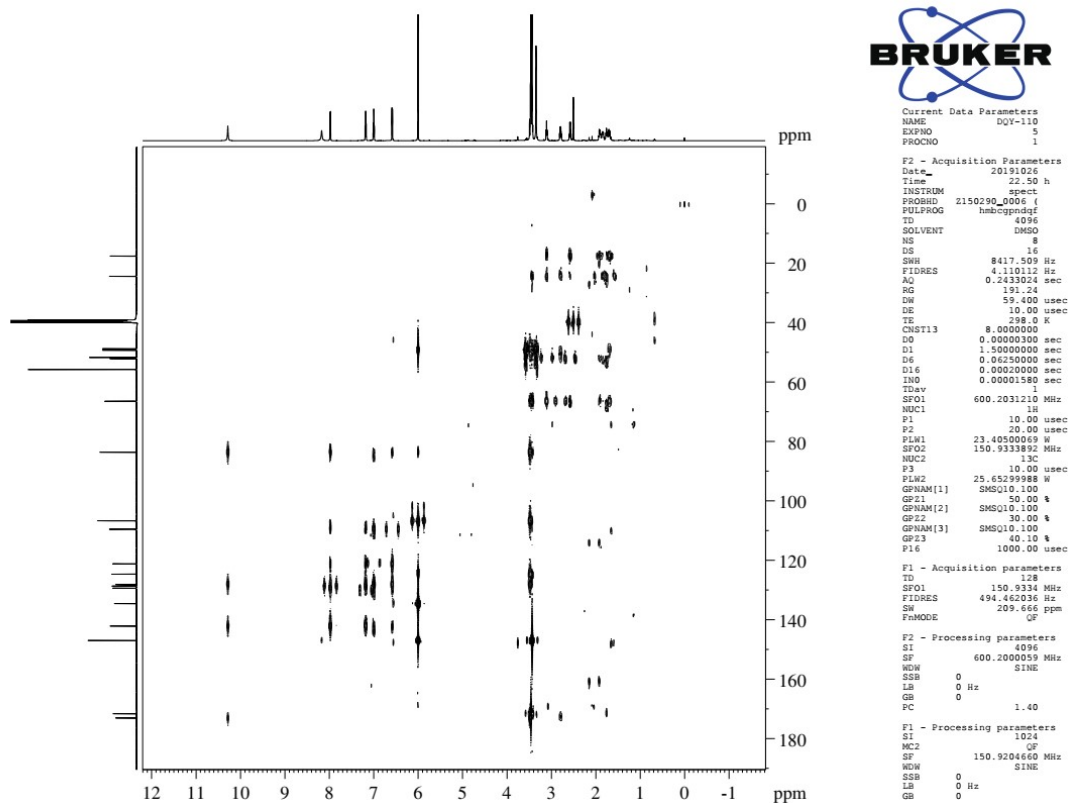

Fig. S6. HMBC spectrum (600 MHz, DMSO- $d_6$ ) of compound 1.

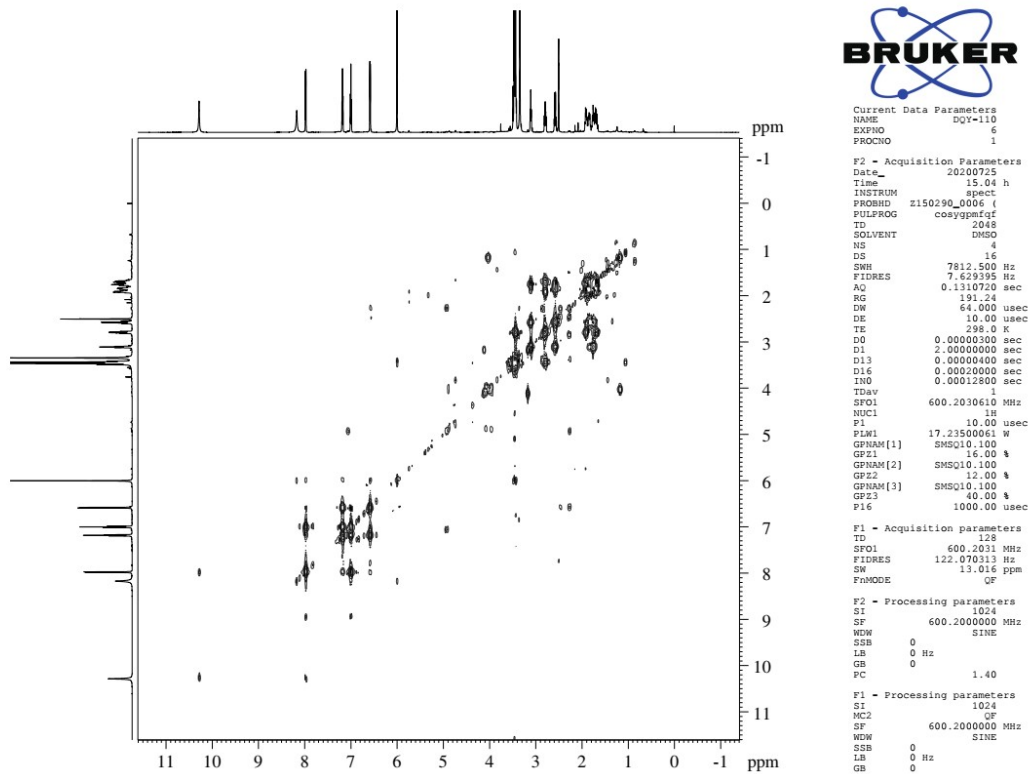

Fig. S7.  $^1\text{H}$ - $^1\text{H}$  COSY spectrum (600 MHz,  $\text{DMSO}-d_6$ ) of compound 1.

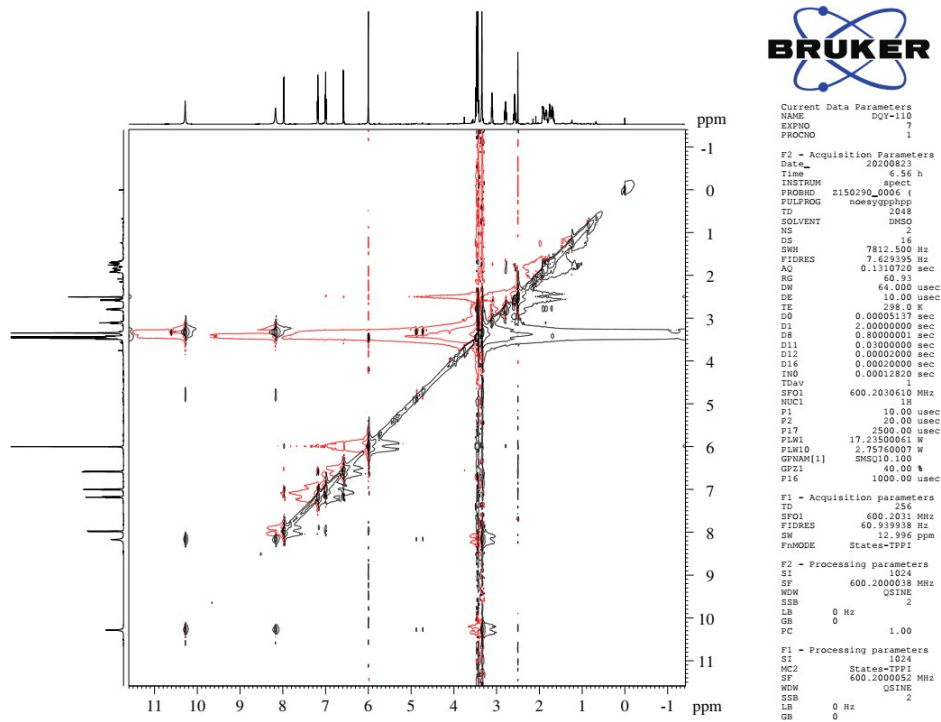

Fig. S8. NOESY spectrum (600 MHz,  $\text{DMSO}-d_6$ ) of compound 1.

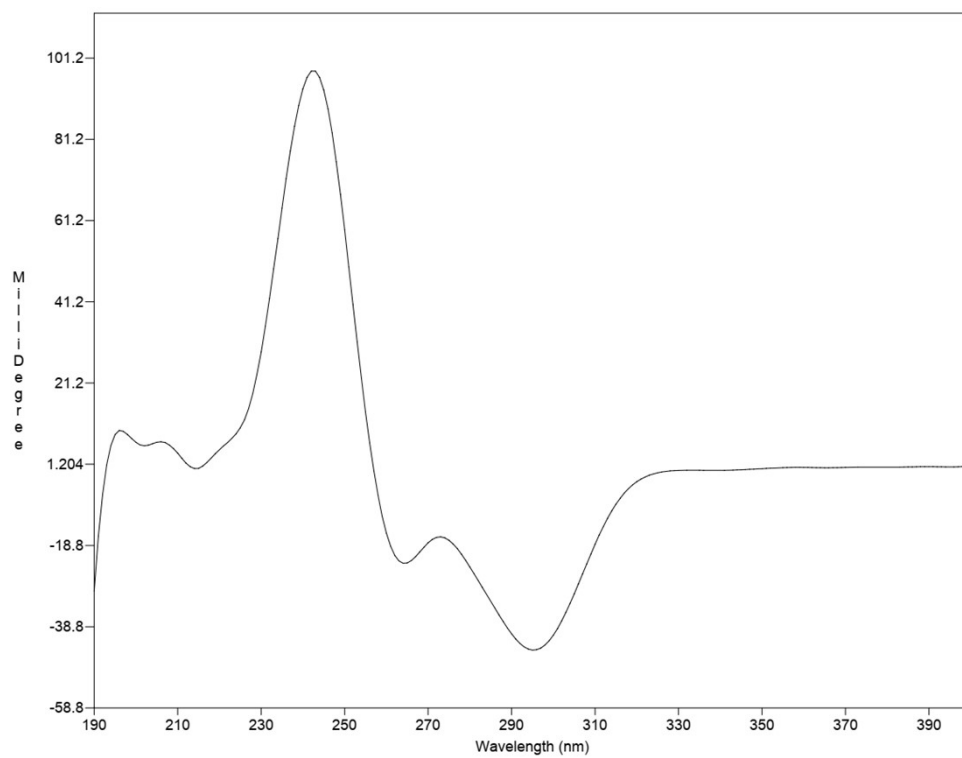

**Fig. S9.** Experimental ECD spectra of **1a**.

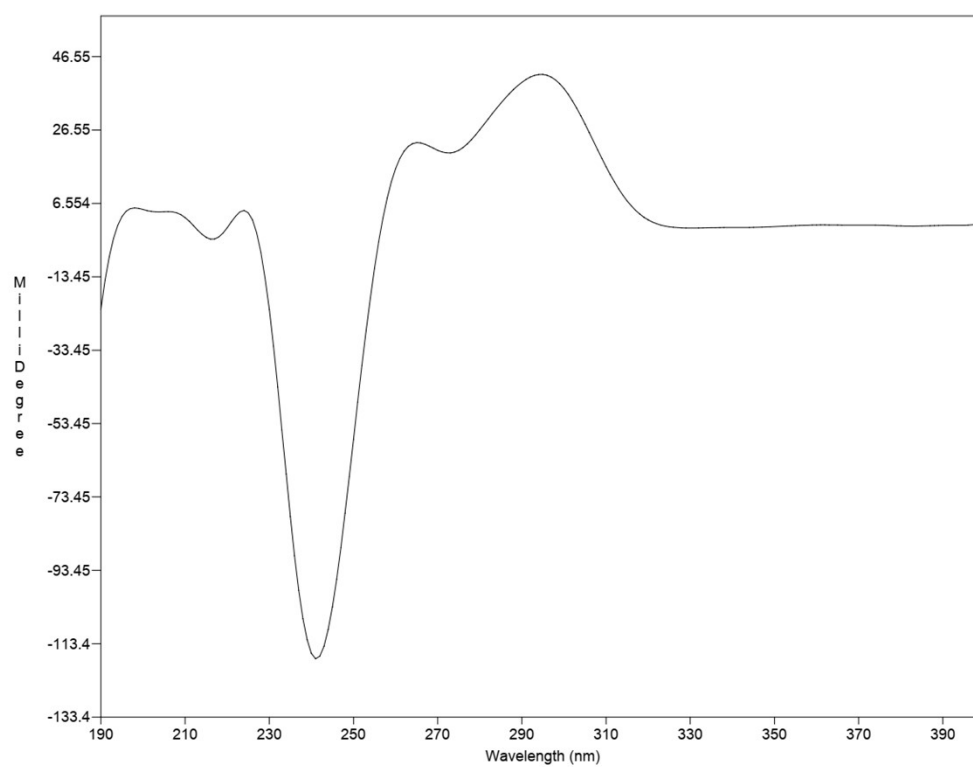

**Fig. S10.** Experimental ECD spectra of **1b**.

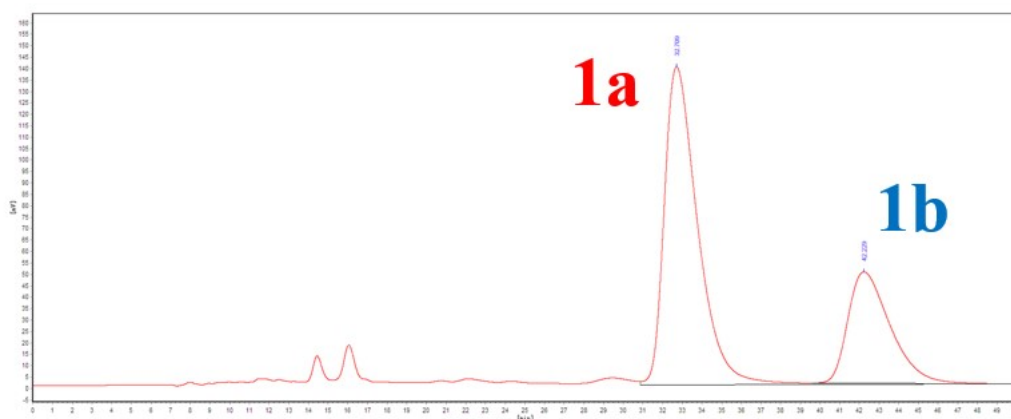

Fig. S11. The chiral HPLC chromatogram of compounds **1a** and **1b**.

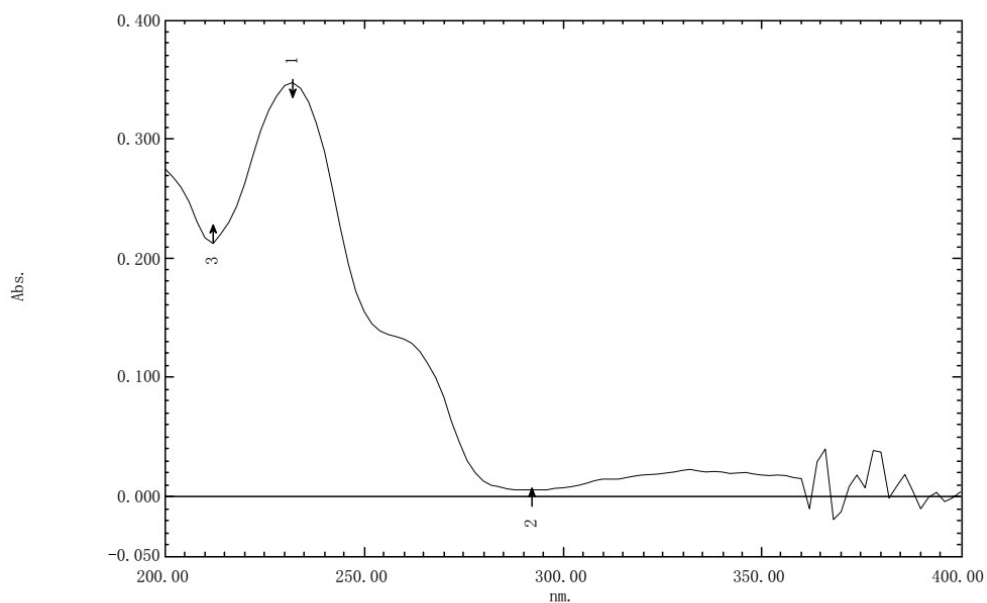

测定属性  
 波长范围 (nm.): 200.00到400.00  
 扫描速度: 高速  
 采样间隔: 2.0  
 自动采样间隔: 停用  
 扫描模式: 单一的

| No. | P/V | Wavelength | Abs. | 描述 |
|-----|-----|------------|------|----|
| 1   | ⬆   | 232.00     | .335 |    |
| 2   | ⬆   | 292.00     | .006 |    |
| 3   | ⬆   | 212.00     | .228 |    |

Fig. S12 UV spectrum of compound **2**.

## Mass Spectrum SmartFormula Report

**Analysis Info**

Analysis Name G:\20170601CEYANG\C2-8-6\_1-E,1\_01\_9815.d  
 Method 20131026\_ceyang.m  
 Sample Name C2-8-6  
 Comment

Acquisition Date 6/1/2017 2:17:51 PM

Operator Bruker Customer  
 Instrument / Ser# micrOTOF-Q 125

**Acquisition Parameter**

|             |          |                       |           |                  |           |
|-------------|----------|-----------------------|-----------|------------------|-----------|
| Source Type | ESI      | Ion Polarity          | Positive  | Set Nebulizer    | 1.2 Bar   |
| Focus       | Active   | Set Capillary         | 4500 V    | Set Dry Heater   | 180 °C    |
| Scan Begin  | 50 m/z   | Set End Plate Offset  | -500 V    | Set Dry Gas      | 8.0 l/min |
| Scan End    | 1500 m/z | Set Collision Cell RF | 400.0 Vpp | Set Divert Valve | Source    |

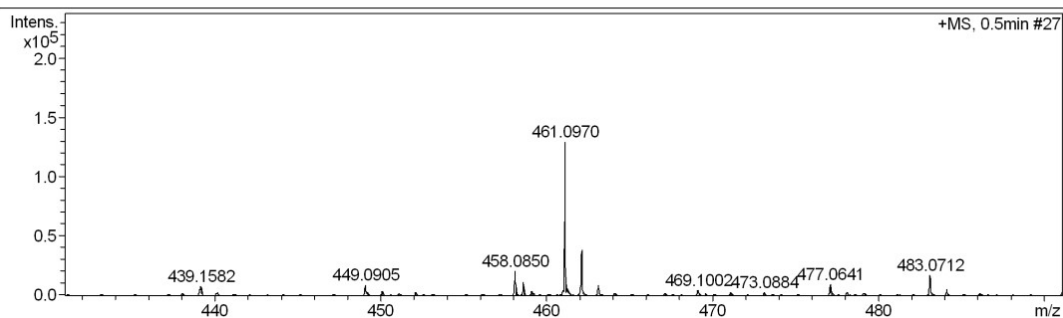

| Meas. #  | Formula                                                           | m/z      | err [ppm] | Mean err [ppm] | rdb  | N-Rule | e <sup>-</sup> Conf | mSigma | Std I  | Std Mean m/z | Std I VarNo | Std m/z Diff | Std Comb Dev |
|----------|-------------------------------------------------------------------|----------|-----------|----------------|------|--------|---------------------|--------|--------|--------------|-------------|--------------|--------------|
| 461.0970 | 1 C <sub>22</sub> H <sub>18</sub> N <sub>2</sub> NaO <sub>8</sub> | 461.0955 | -3.2      | 0.6            | 14.5 | ok     | even                | 30.06  | 0.0584 | 0.0029       | 0.0189      | 0.0062       | 0.8427       |

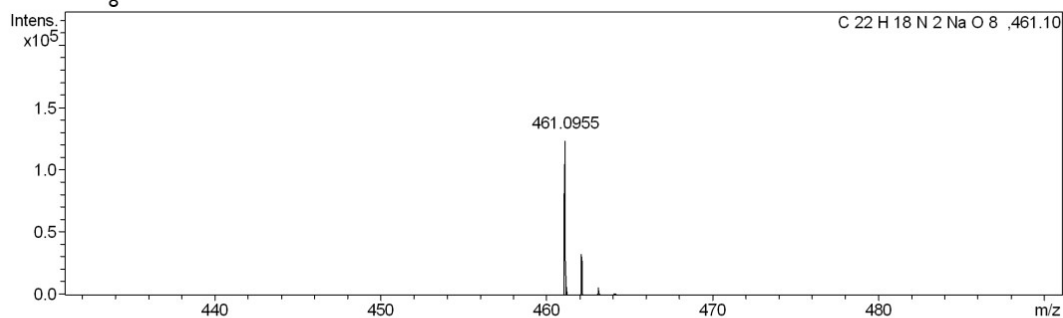

| Meas. #  | Formula                                                           | m/z      | err [ppm] | Mean err [ppm] | rdb  | N-Rule | e <sup>-</sup> Conf | mSigma | Std I  | Std Mean m/z | Std I VarNo | Std m/z Diff | Std Comb Dev |
|----------|-------------------------------------------------------------------|----------|-----------|----------------|------|--------|---------------------|--------|--------|--------------|-------------|--------------|--------------|
| 461.0970 | 1 C <sub>22</sub> H <sub>18</sub> N <sub>2</sub> NaO <sub>8</sub> | 461.0955 | -3.2      | 0.6            | 14.5 | ok     | even                | 30.06  | 0.0584 | 0.0029       | 0.0189      | 0.0062       | 0.8427       |

**Fig. S13** HRESIMS spectrum of compound 2.

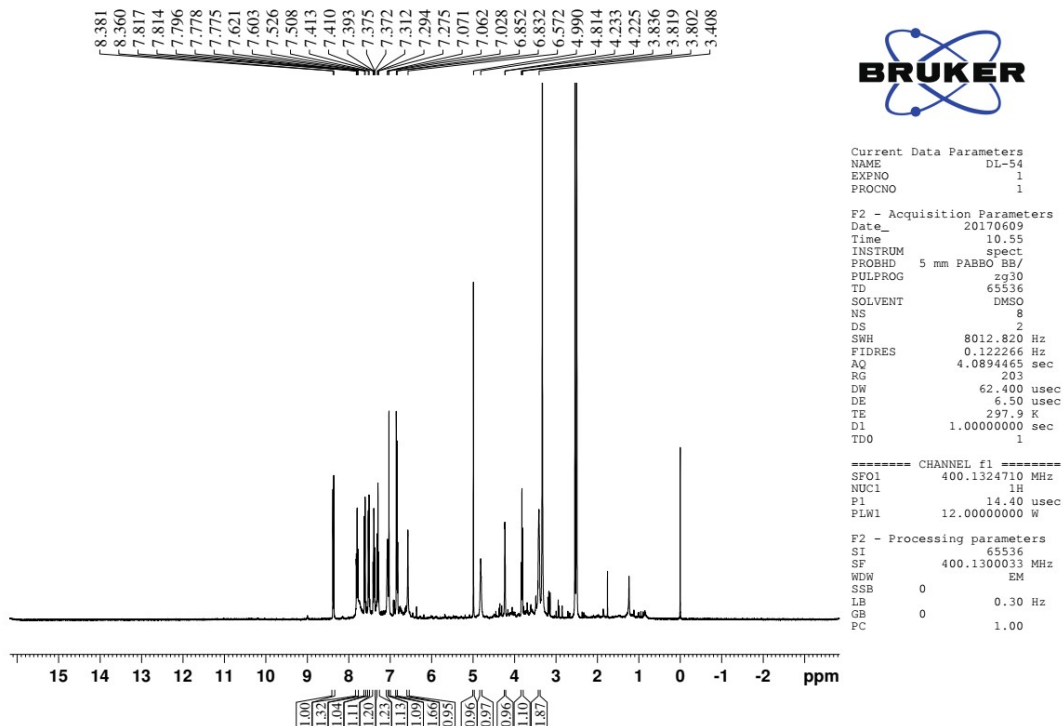

Fig. S14  $^1\text{H}$  NMR spectrum (400 MHz,  $\text{DMSO-}d_6$ ) of compound 2.

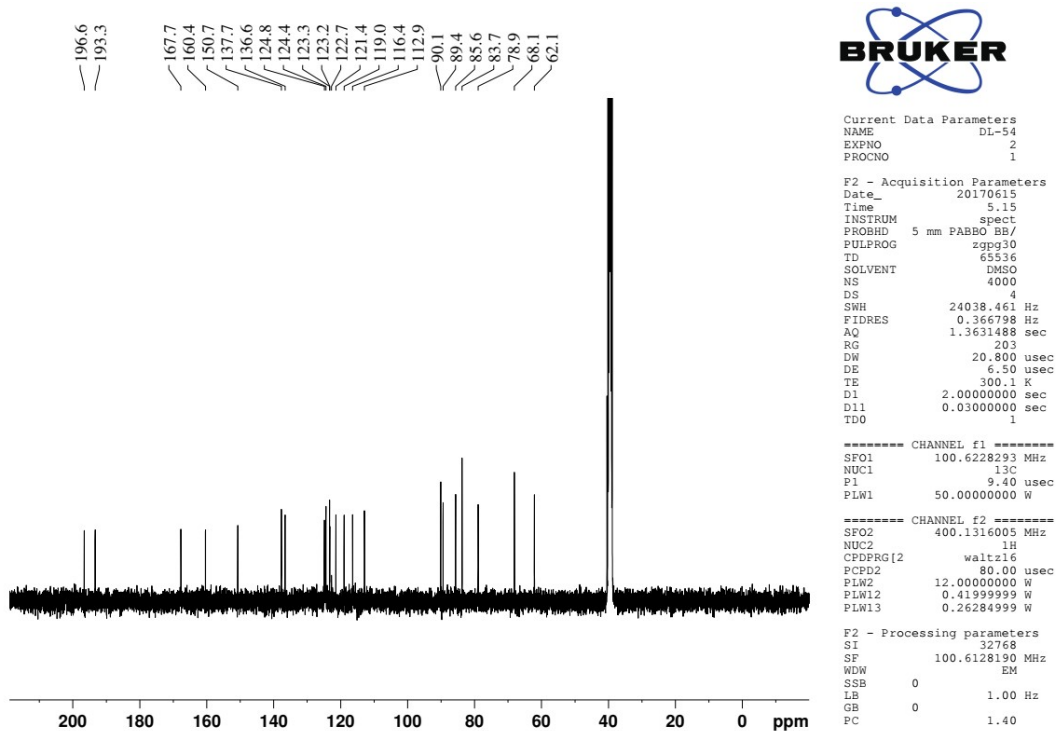

Fig. S15  $^{13}\text{C}$  NMR spectrum (100 MHz,  $\text{DMSO-}d_6$ ) of compound 2.

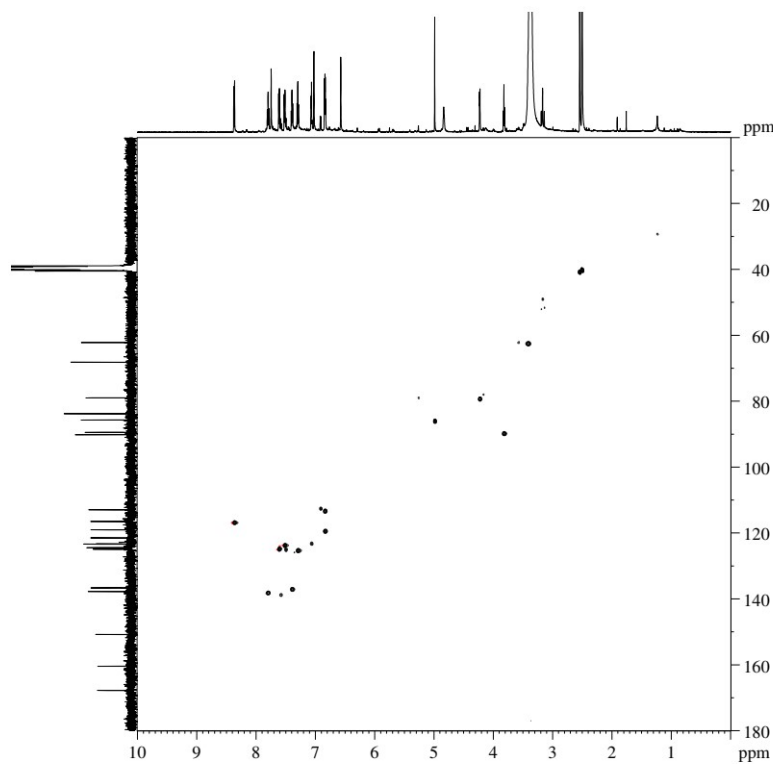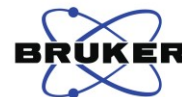

```

Current Data Parameters
NAME          DL-54
EXPNO        9
PROCNO       1

F2 - Acquisition Parameters
Date_         20170910
Time         18.19
INSTRUM      spect
PROBHD       5 mm PABBO BB-
PULPROG      hsqcetopt1
TD           1024
SOLVENT      DMSO
NS           16
DS           16
SWH          6009.615 Hz
FIDRES      0.868765 Hz
AQ           0.0851968 sec
RG           251.00
DE           83.200 usec
TE           296.2 K
CHST2       145.000000
D0           0.0000100 sec
D1           1.5000000 sec
D4           0.0017244 sec
D11          0.0000000 sec
D13          0.0000000 sec
D14          0.0000000 sec
D24          0.0011000 sec
IN0          0.0000100 sec
ZGPGPNS

===== CHANNEL f1 =====
NUC1         13C
P1           11.10 usec
P2           22.20 usec
P28          2500.00 usec
PL1          4.00 dB
PL1W         34.70245579 MHz
SFO1         600.1300000 MHz

===== CHANNEL f2 =====
CPDPRG2      9389
NUC2         13C
P3           9.53 usec
P4           19.06 usec
PCPD2       81.00 usec
PL2          1.00 dB
PL2W        83.20243835 MHz
PL1W        83.20243835 MHz
P12W        1.1809545 MHz
SFO2        150.9143903 MHz

===== GRADIENT CHANNEL =====
GPNAM[1]     SINE.100
GPNAM[2]     SINE.100
GFC1         50.00 %
GFC2         10.00 %
GFC3         40.10 %
G14          1000.00 usec

F1 - Acquisition parameters
TD           256
SFO1         150.9144 MHz
FIDRES      212.226181 Hz
SR          180.000 ppm
FUNMODE     Echo-Antiecho

F2 - Processing parameters
SI           1024
SF           600.1300000 MHz
WDW          SINC
SSB          0 Hz
GB           0
PC           1.40

F1 - Processing parameters
SI           1024
MC2         echo-antiecho
SF           150.9028870 MHz
WDW          SINC
SSB          0 Hz
GB           0
PC           1.40

```

Fig. S16. HSQC spectrum (600 MHz, DMSO-*d*<sub>6</sub>) of compound 2.

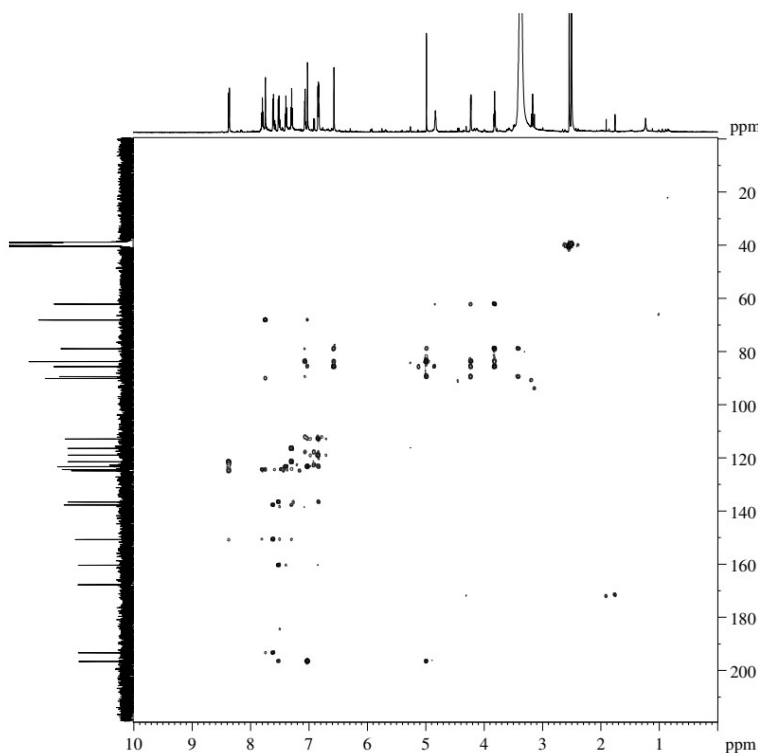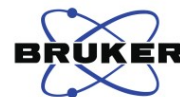

```

Current Data Parameters
NAME          DL-54
EXPNO        9
PROCNO       1

F2 - Acquisition Parameters
Date_         20170910
Time         20.12
INSTRUM      spect
PROBHD       5 mm PABBO BB-
PULPROG      hmqcspopt1
TD           1024
SOLVENT      DMSO
NS           16
DS           16
SWH          6009.615 Hz
FIDRES      0.868765 Hz
AQ           0.0851968 sec
RG           251.00
DE           83.200 usec
TE           296.2 K
CHST3       145.000000
D0           0.0000000 sec
D1           1.5000000 sec
D4           0.0017244 sec
D11          0.0000000 sec
D13          0.0000000 sec
D14          0.0000000 sec
D24          0.0001505 sec
IN0          0.0000100 sec
ZGPGPNS

===== CHANNEL f1 =====
NUC1         13C
P1           11.10 usec
P2           22.20 usec
P28          2500.00 usec
PL1          4.00 dB
PL1W         34.70245579 MHz
SFO1         600.1300000 MHz

===== CHANNEL f2 =====
CPDPRG2      9389
NUC2         13C
P3           9.53 usec
P4           19.06 usec
PCPD2       81.00 usec
PL2          1.00 dB
PL2W        83.20243835 MHz
PL1W        83.20243835 MHz
P12W        1.1809545 MHz
SFO2        150.9143903 MHz

===== GRADIENT CHANNEL =====
GPNAM[1]     SINE.100
GPNAM[2]     SINE.100
GFC1         50.00 %
GFC2         10.00 %
GFC3         40.10 %
G14          1000.00 usec

F1 - Acquisition parameters
TD           256
SFO1         150.9144 MHz
FIDRES      265.618164 Hz
SR          220.000 ppm
FUNMODE     QF

F2 - Processing parameters
SI           1024
SF           600.1299970 MHz
WDW          SINC
SSB          0 Hz
GB           0
PC           1.40

F1 - Processing parameters
SI           1024
MC2         QF
SF           150.9028870 MHz
WDW          SINC
SSB          0 Hz
GB           0
PC           1.40

```

Fig. S17. HMBC spectrum (600 MHz, DMSO-*d*<sub>6</sub>) of compound 2.

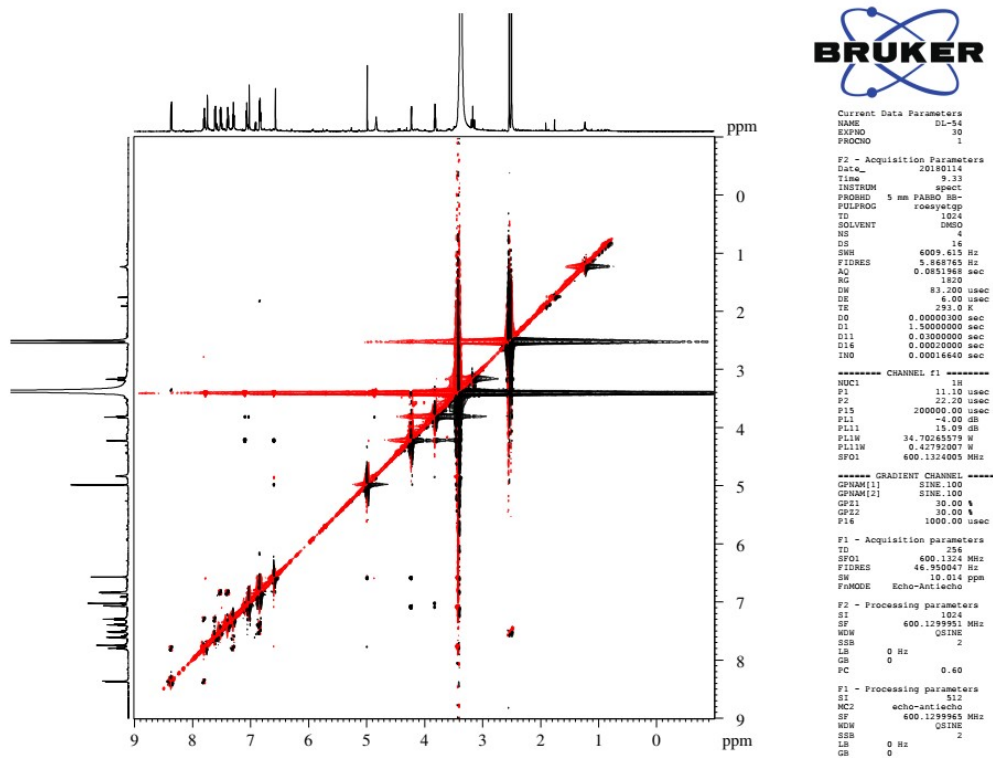

Fig. S18. ROESY spectrum (600 MHz, DMSO- $d_6$ ) of compound 2.

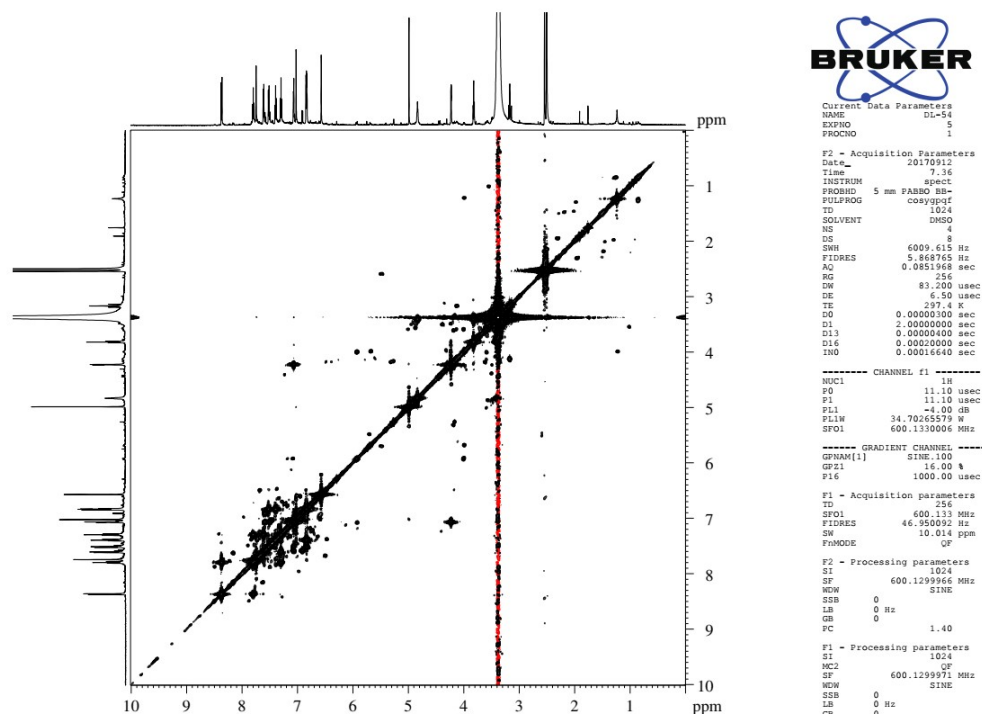

Fig. S19.  $^1\text{H}$ - $^1\text{H}$  COSY spectrum (600 MHz, DMSO- $d_6$ ) of compound 2.



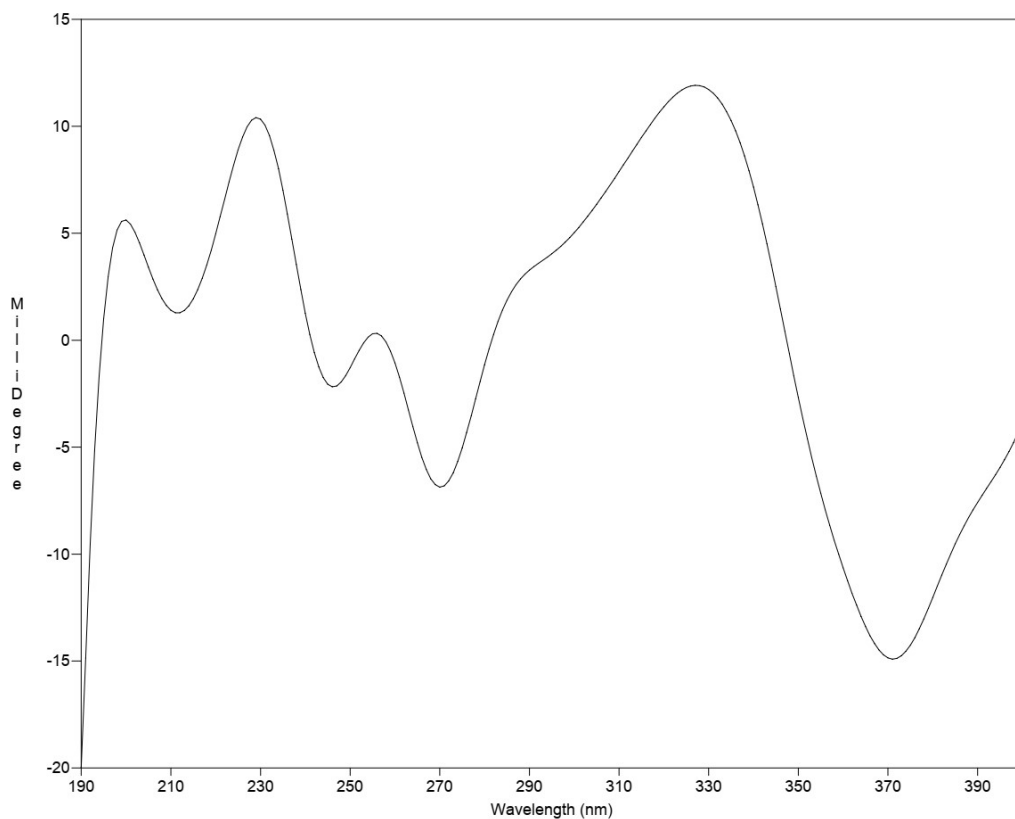

**Fig. S20.** Experimental ECD spectra of **2**.

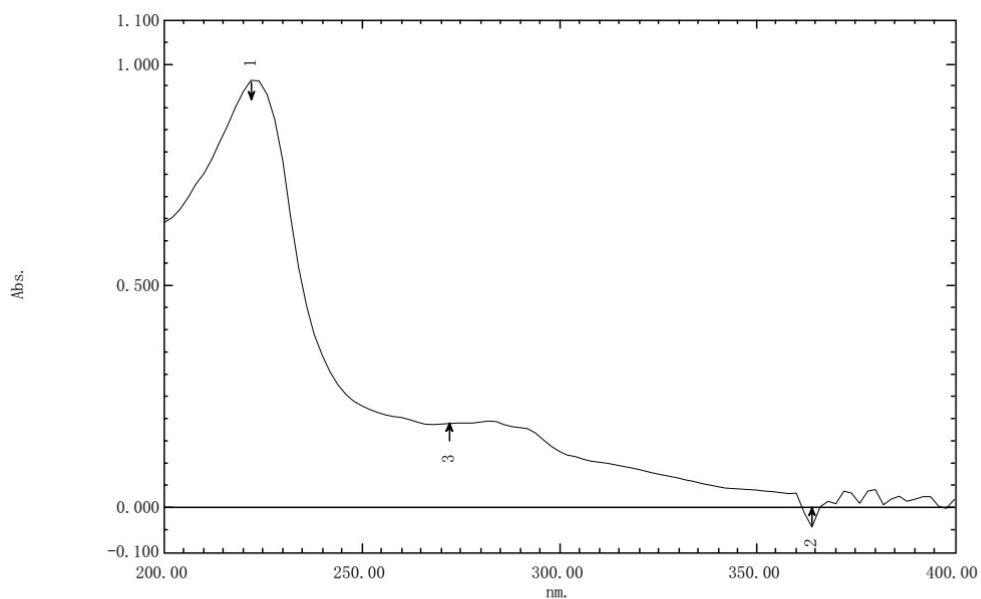

测定属性  
 波长范围 (nm.): 200.00到400.00  
 扫描速度: 高速  
 采样间隔: 2.0  
 自动采样间隔: 停用  
 扫描模式: 单一的

| No. | P/V | Wavelength | Abs. | 描述 |
|-----|-----|------------|------|----|
| 1   | ⬆   | 222.00     | .921 |    |
| 2   | ⬇   | 364.00     | .001 |    |
| 3   | ⬆   | 272.00     | .190 |    |

**Fig. S21** UV spectrum of compound **3**.

## Mass Spectrum SmartFormula Report

|                      |                                          |                  |                       |                 |
|----------------------|------------------------------------------|------------------|-----------------------|-----------------|
| <b>Analysis Info</b> |                                          | Acquisition Date | 9/26/2017 12:54:25 PM |                 |
| Analysis Name        | G:\20170926CEYANG\DL-96_1-D_5_01_10474.d |                  | Operator              | Bruker Customer |
| Method               | 20131026_ceyang b-ch3oh.m                |                  | Instrument / Ser#     | micrOTOF-Q 125  |
| Sample Name          | DL-96                                    |                  |                       |                 |
| Comment              |                                          |                  |                       |                 |

### Acquisition Parameter

|             |          |                       |           |                  |           |
|-------------|----------|-----------------------|-----------|------------------|-----------|
| Source Type | ESI      | Ion Polarity          | Positive  | Set Nebulizer    | 1.2 Bar   |
| Focus       | Active   | Set Capillary         | 4500 V    | Set Dry Heater   | 180 °C    |
| Scan Begin  | 50 m/z   | Set End Plate Offset  | -500 V    | Set Dry Gas      | 8.0 l/min |
| Scan End    | 1500 m/z | Set Collision Cell RF | 400.0 Vpp | Set Divert Valve | Source    |

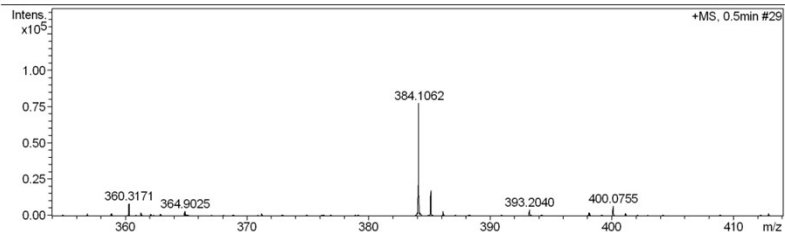

| Meas. #  | Formul a             | m/z      | err [ppm] | Mean err [ppm] | rdb | N-Rule | e <sup>-</sup> Conf | mSigma a | Std I  | Std Mean m/z | Std I VarNor m | Std m/z Diff | Std Comb Dev |
|----------|----------------------|----------|-----------|----------------|-----|--------|---------------------|----------|--------|--------------|----------------|--------------|--------------|
| 384.1062 | 1 C 18 H 19 N Na O 7 | 384.1054 | -2.2      | 1.5            | 9.5 | ok     | even                | 16.25    | 0.0283 | 0.0028       | 0.0121         | 0.0065       | 0.8427       |

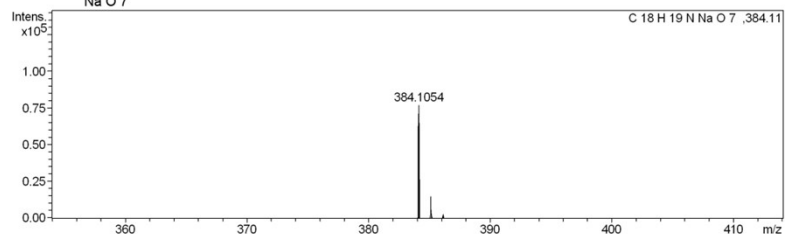

| Meas. #  | Form ula           | m/z    | err [ppm] | Mean err [ppm] | rdb | N-Rul e | e <sup>-</sup> Conf | mSig ma | Std I | Std Mean m/z | Std I VarNo rm | Std m/z Diff | Std Comb Dev |
|----------|--------------------|--------|-----------|----------------|-----|---------|---------------------|---------|-------|--------------|----------------|--------------|--------------|
| 384.1054 | C 18 H 19 N Na O 7 | 384.11 |           |                |     |         |                     |         |       |              |                |              |              |

**Fig. S22** HRESIMS spectrum of compound 3.

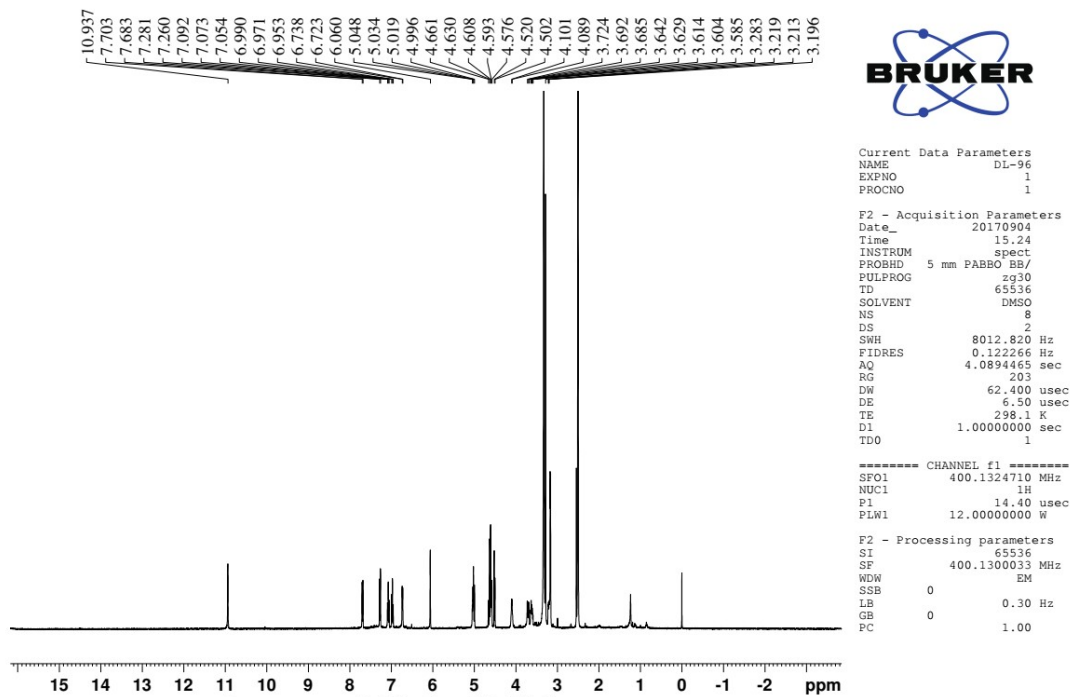

**Fig. S23** <sup>1</sup>H NMR spectrum (400 MHz, DMSO-*d*<sub>6</sub>) of compound 3.

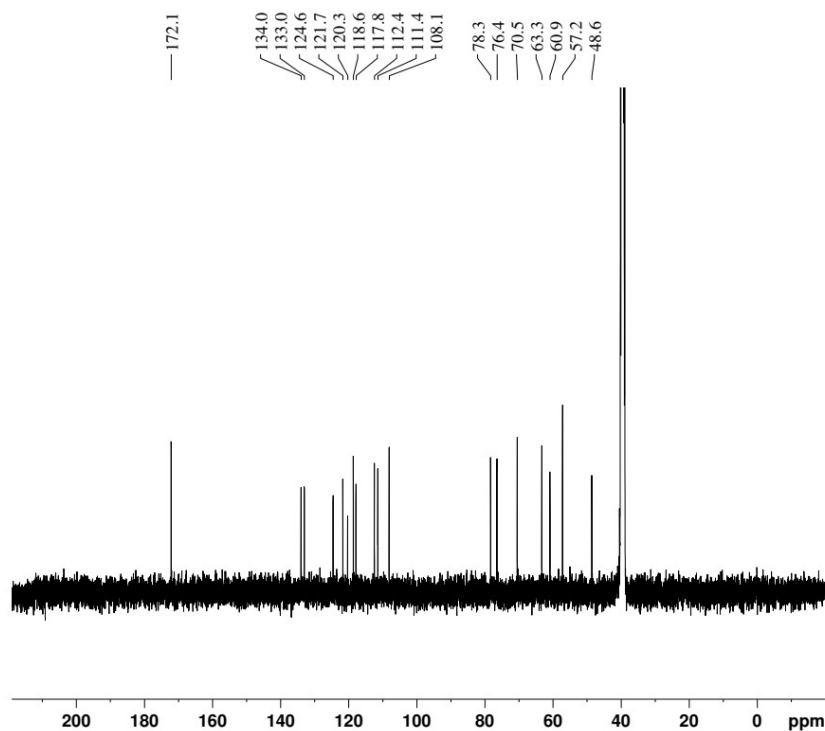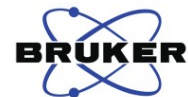

```

Current Data Parameters
NAME          DL-96
EXPNO         2
PROCNO        1

F2 - Acquisition Parameters
Date_         20170913
Time          9.13
INSTRUM       spect
PROBHD        5 mm PABBO BB/
PULPROG       zgpg30
TD            65536
SOLVENT       DMSO
NS            10000
DS            4
SWH           24038.461 Hz
FIDRES        0.366798 Hz
AQ            1.3631488 sec
RG            203
DW            20.800 usec
DE            6.50 usec
TE            300.0 K
D1            2.00000000 sec
D11           0.03000000 sec
TD0           1

===== CHANNEL f1 =====
SFO1          100.628293 MHz
NUC1          13C
P1            9.40 usec
PLW1          50.0000000 W

===== CHANNEL f2 =====
SFO2          400.1316005 MHz
NUC2          1H
CPDPRG2       waltz16
PCPD2         80.00 usec
PLW2          12.00000000 W
PLW12         0.41999999 W
PLW13         0.26284999 W

F2 - Processing parameters
SI            32768
SF            100.6128185 MHz
WDW           EM
SSB           0
LB            1.00 Hz
GB            0
PC            1.40

```

Fig. S24  $^{13}\text{C}$  NMR spectrum (100 MHz,  $\text{DMSO-}d_6$ ) of compound 3.

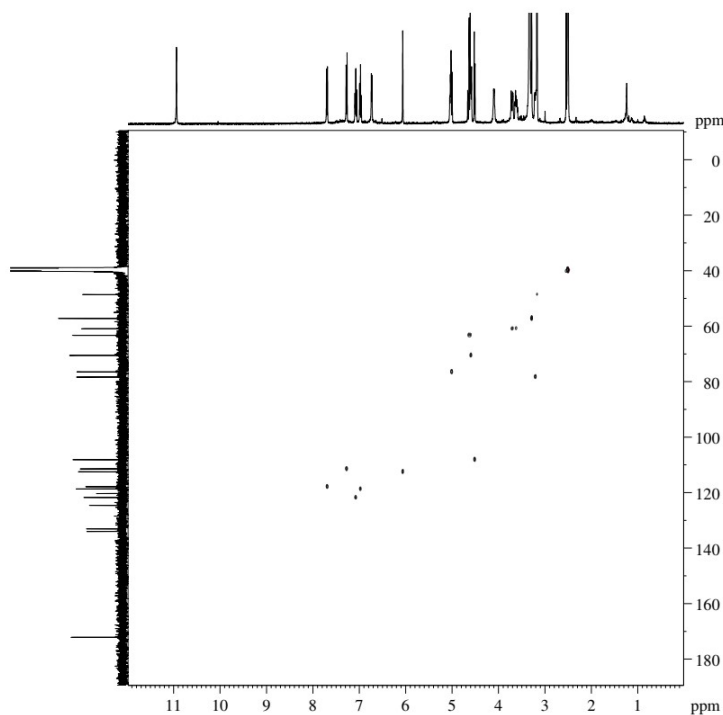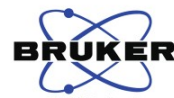

```

Current Data Parameters
NAME          DL-96
EXPNO         2
PROCNO        1

F2 - Acquisition Parameters
Date_         20180928
Time          10.31
INSTRUM       spect
PROBHD        5 mm PABBO BB/
PULPROG       hugocor1
TD            65536
SOLVENT       DMSO
NS            10000
DS            4
SWH           7183.908 Hz
FIDRES        7.015535 Hz
AQ            0.071704 sec
RG            25100
DW            69.400 usec
DE            6.50 usec
TE            298.4 K
===== CHANNEL f1 =====
SFO1          600.136200 MHz
NUC1          13C
P1            11.10 usec
PLW1          22.20 usec
LB            1.00 Hz
GB            0
PC            1.40

===== CHANNEL f2 =====
SFO2          400.1316005 MHz
NUC2          1H
P2            15.00 usec
PLW2          15.00 usec
LB            1.00 Hz
GB            0
PC            1.40

===== GRADIENT CHANNEL =====
GRAMP1[1]    SINE 100
GRAMP1[2]    SINE 100
GRF1         80.00 Hz
GRF2         20.10 Hz
F14          1000.00 usec

F1 - Acquisition parameters
TD           256
SFO1         150.1164 MHz
FIDRES       235.806854 Hz
AQ           100.00000000 sec
FAMODE       Echo-Antiecho

F1 - Processing parameters
SI            65536
SF            600.136200 MHz
WDW           SINE
SSB           0 Hz
LB            1.40
GB            0
PC            1.40

F1 - Processing parameters
SI            65536
SF            400.1316005 MHz
WDW           SINE
SSB           0 Hz
LB            1.40
GB            0
PC            1.40

```

Fig. S25. HSQC spectrum (600 MHz,  $\text{DMSO-}d_6$ ) of compound 3.

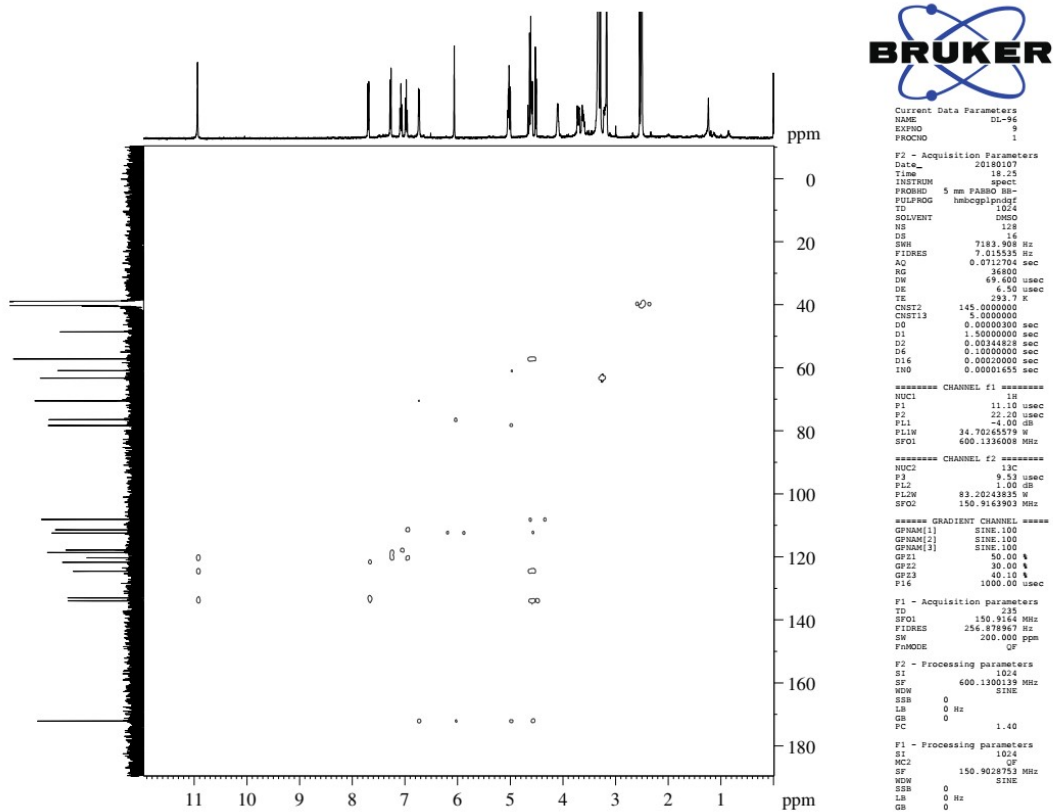

Fig. S26. HMBC spectrum (600 MHz, DMSO- $d_6$ ) of compound 3.

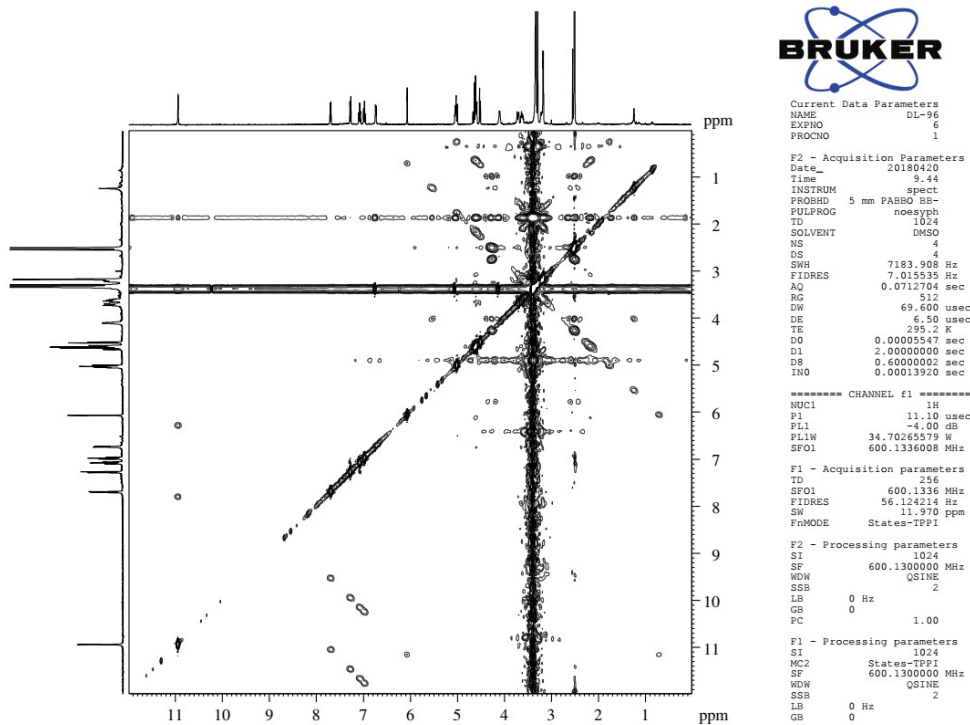

Fig. S27. NOESY spectrum (600 MHz, DMSO- $d_6$ ) of compound 3.

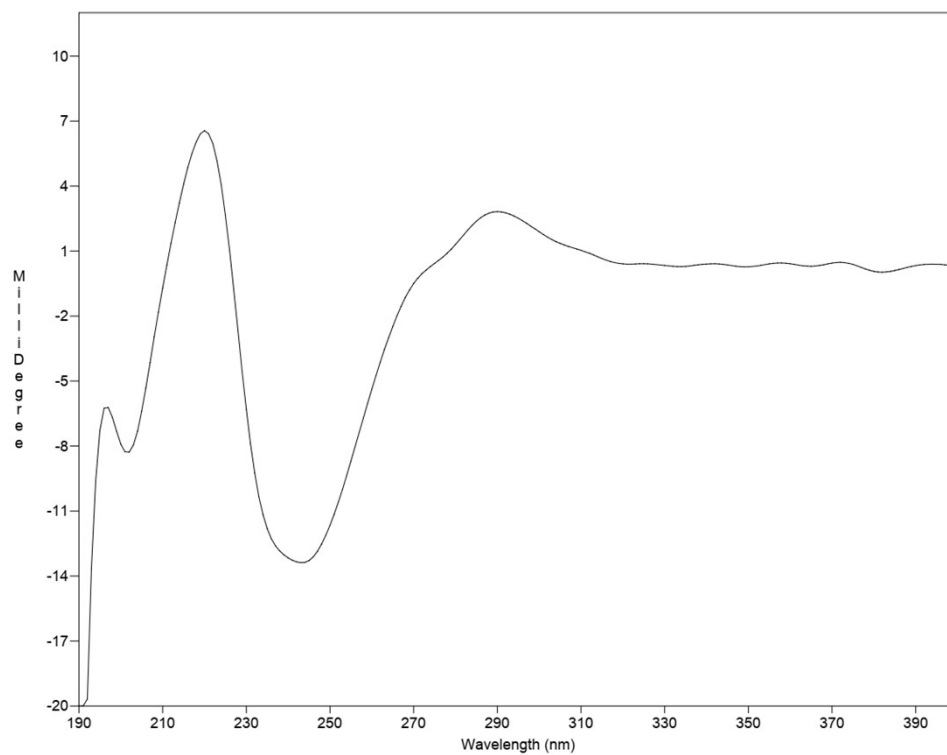

**Fig. S28.** Experimental ECD spectra of **3**.
